# Supplementary material for: High Neuroticism Is Related to More Overall Functional Problems and Lower Function Scores in Men Who Had Surgery for Non-Relapsing Prostate Cancer
Source: MDPI journal article supplement (doi:10.3390/curroncol29080459), 2022-08-17
Supplement: s1 [file s1]

## Supplement.

### The 6-item version of neuroticism based on the Eysenck Personality Questionnaire.

**Instruction:** The items below concern how you usually behave, feel, or act. Please, set a ring round the number for either Yes or No for each item. Please, respond quickly and do not think too long about the meaning of each item.

| Items |                                                                     | Yes | No |
|-------|---------------------------------------------------------------------|-----|----|
| 1.    | Are you often worried?                                              | 1   | 0  |
| 2.    | Are your feelings easily hurt?                                      | 1   | 0  |
| 3.    | Do you often feel that you lose interest?                           | 1   | 0  |
| 4.    | Do you have nervous problems?                                       | 1   | 0  |
| 5.    | Do you often feel tired and indifferent/unmotivated without reason? | 1   | 0  |
| 6.    | Do you worry that terrible things might happen?                     | 1   | 0  |

Low neuroticism score: sum score 0 – 2; High neuroticism score: sum score 3 – 6) (reference #14).
